# Supplementary material for: Dissecting the essentiality of the bifunctional trypanothione synthetase-amidase in Trypanosoma brucei using chemical and genetic methods
Source: PubMed Central journal article supplement (PMC2784880; doi:10.1111/j.1365-2958.2009.06761.x), 2009-06-24
Supplement: mmi0074-0529-SD1.pdf [file mmi0074-0529-SD1.pdf]

## Supporting Information:

### Dissecting the essentiality of the bifunctional trypanothione synthetase-amidase in *Trypanosoma brucei* using chemical and genetic methods

Susan Wyllie, Sandra L. Oza, Stephen Patterson, Daniel Spinks, Stephen  
Thompson and Alan H. Fairlamb

**Table S1. Intracellular thiols of *T. brucei* transgenic cell lines** Thiols were determined as described in Materials and Methods. Each value represents the mean of triplicate determinations.

| Cell line           | Thiols<br>nmol (10 <sup>8</sup> cells) <sup>-1</sup> |                    |
|---------------------|------------------------------------------------------|--------------------|
|                     | GSH                                                  | T[SH] <sub>2</sub> |
| WT                  | 0.47 ± 0.05                                          | 0.38 ± 0.02        |
| SKO                 | 0.42 ± 0.02                                          | 0.25 ± 0.01        |
| OE                  | 0.56 ± 0.06                                          | 0.96 ± 0.05        |
| cDKO + tetracycline | 0.51 ± 0.06                                          | 0.42 ± 0.04        |

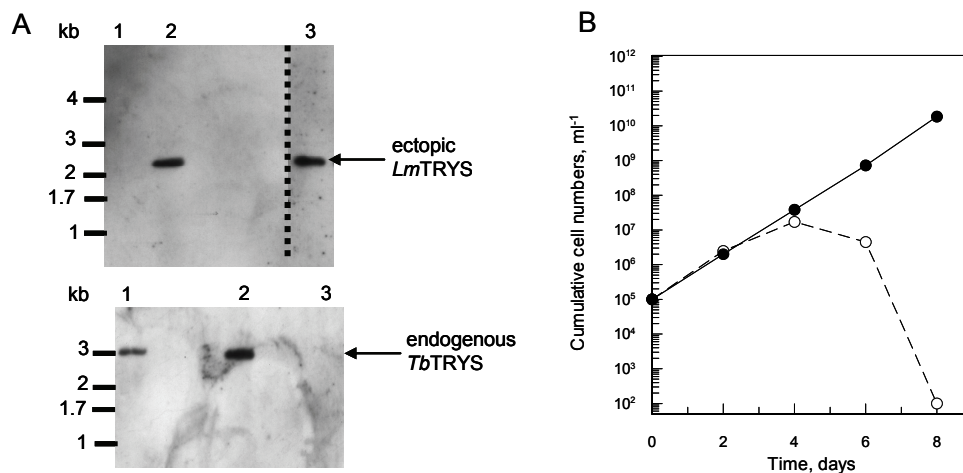

**Fig. S1. Complementation of cDKO cells with ectopic *L. major* TRYSTI.** (A) Confirmation of genotype of *T. brucei* TRYSTI conditional double knockout cell line. Southern-blot analysis of *Pst*I-digested genomic DNA (~5 μg) from wild-type *T. brucei* cells (lane 1), *LmTRYSTI*<sup>TI</sup> $\Delta$ *TRYSTI*::PAC (lane 2) and *LmTRYSTI*<sup>TI</sup> $\Delta$ *TRYSTI*::PAC/ $\Delta$ *TRYSTI*::HYG (lane 3). The *LmTRYSTI* ORF was used as a probe in the upper panel and shows the ectopic copy of *LmTRYSTI*<sup>TI</sup> at ~2.5 kb. The *TbTRYSTI* ORF was used as a probe in the lower panel and the allelic *TbTRYSTI* can be seen at ~3 kb. Dotted line indicates where the southern image was cropped for clarity. (B) The growth of the cDKO cell line expressing *L. major* TRYSTI in HMI9-T media was monitored in the presence (closed circles) and absence of tetracycline (open circles, dashed line).

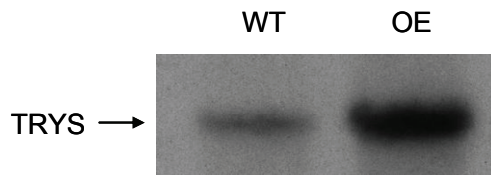

**Fig. S2. Immunoblot analysis of a TRYS overexpressing cell line.** Immunoblots of cell extracts of WT and OE (plus tetracycline) cells were probed with anti-serum to *T. brucei* TRYS ( $1 \times 10^7$  parasites in each lane).

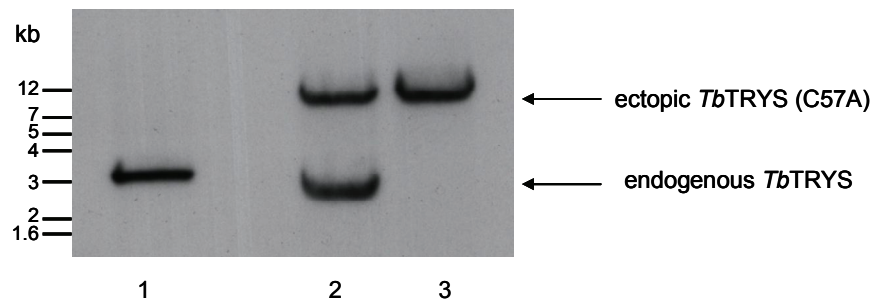

**Fig. S3. Genotypic analysis of cDKO(C57A) cell line.** Genotypic confirmation of the TRYS cDKO(C57A) cell line. Southern-blot analysis of PstI-digested genomic DNA ( $\sim 5 \mu\text{g}$ ) from wild-type *T. brucei* cells (lane 1),  $TRYS(C57A)^{Ti}\Delta TRYS::PAC$  (lane 2) and  $TRYS(C57A)^{Ti}\Delta TRYS::PAC/\Delta TRYS::HYG$  (lane 3) cells; the TRYS ORF probe shows allelic *TbTRY5* at 3 kb and the ectopic copy *TbTRY5(C57A)^{Ti}* at  $\sim 10$  kb.
